# Supplementary material for: Characterization of a candidate tetravalent vaccine based on 2'-O-methyltransferase mutants
Source: PubMed Central journal article supplement (PMC5751980; doi:10.1371/journal.pone.0189262), 2018-01-03
Supplement: pone.0189262.s001.pdf [file pone.0189262.s001.pdf]

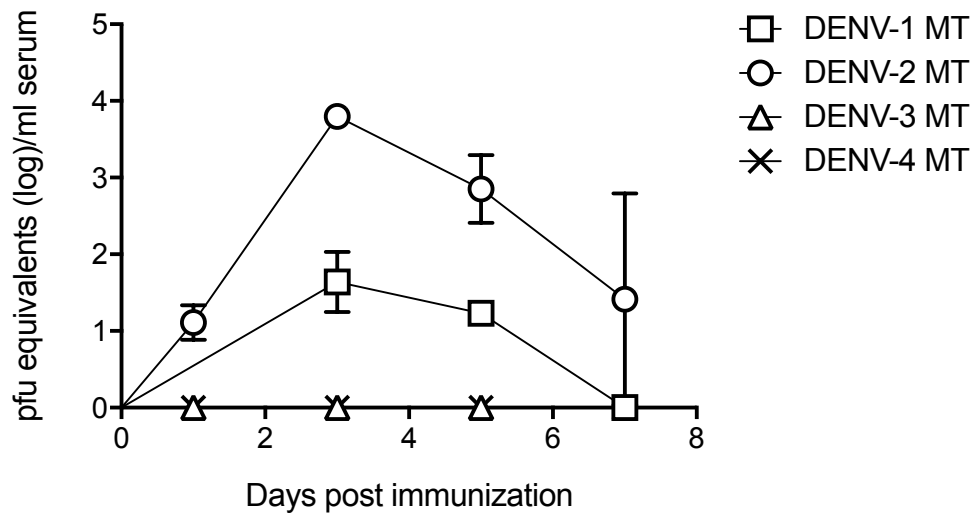

**Supplementary Figure 1: Kinetics of viremia after immunization with a DENV-1:DENV-2:DENV-3:DENV-4 ratio of 10:1:10:10.** Mice (n=4 per group) were immunized with a mixture of  $10^4$  pfu of DENV-2 and  $10^5$  pfu of DENV-1, DENV-3 and DENV-4. Viremia was measured at the indicated time points after immunization by RT-PCR using serotype-specific primers. MT: 2'-O-methyltransferase mutant virus. Means $\pm$ SD are shown.
